# Supplementary material for: Silicon dioxide nanofluids with low-salinity brines for interfacial tension and wettability control in enhanced oil recovery
Source: Royal Society of Chemistry journal article supplement (doi:10.1039/d5re00474h), 2025-12-12
Supplement: d5re00474h1.pdf [file d5re00474h1.pdf]

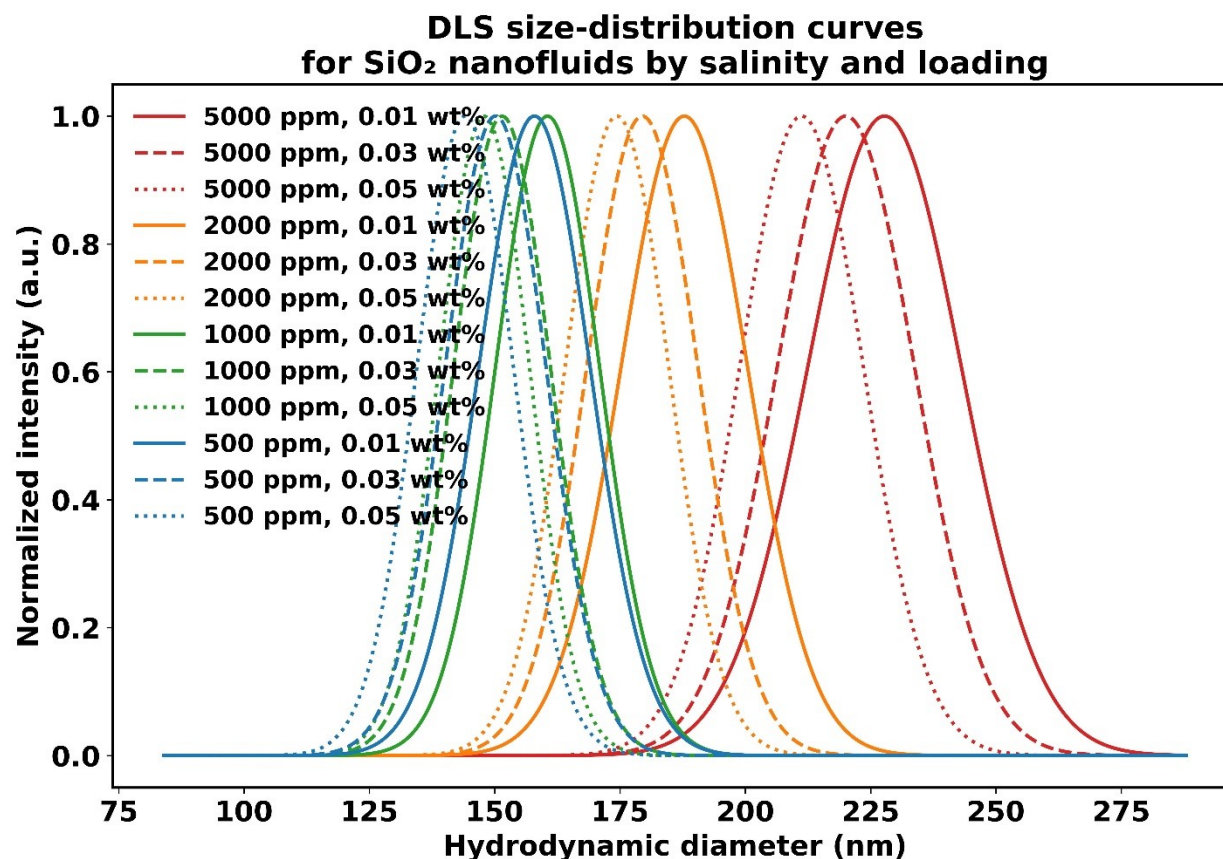

Figure S1: DLS size-distribution curves for SiO<sub>2</sub> nanofluids as a function of salinity and nanoparticle loading. Hydrodynamic diameter distributions are shown for 0.01, 0.03, and 0.05 wt% SiO<sub>2</sub> at 500, 1000, 2000, and 5000 ppm NaCl, with color indicating salinity and line style indicating loading. Peaks shift to smaller diameters and become narrower as salinity decreases and  $|\zeta|$  increases, consistent with reduced aggregation and higher dispersion stability reported in Table 2A.

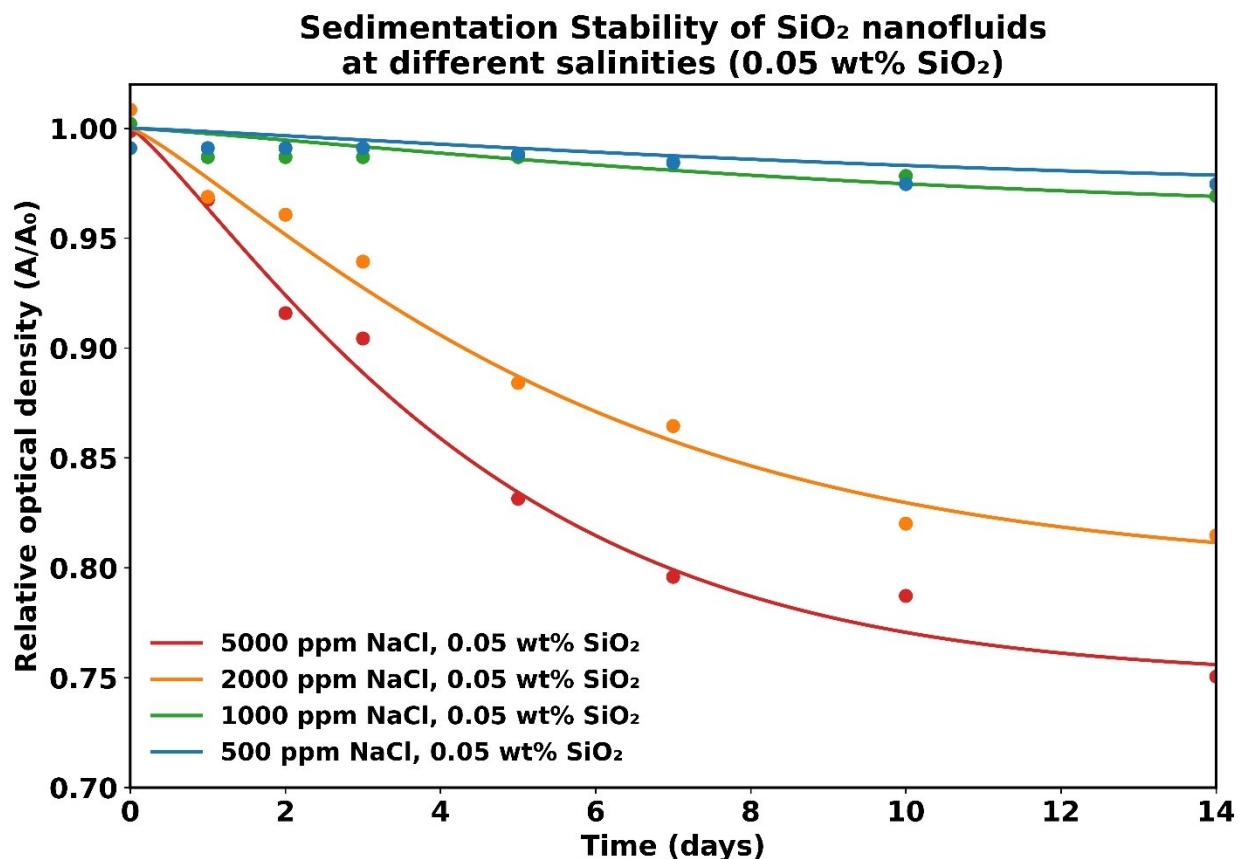

Figure S2: Sedimentation stability of 0.05 wt% SiO<sub>2</sub> nanofluids at different salinities. Relative optical density ( $A/A_0$ ) is plotted over 14 days for 500, 1000, 2000, and 5000 ppm NaCl, with markers representing measurement points and smooth curves highlighting sedimentation trends. Low-salinity formulations (500–1000 ppm) maintain  $A/A_0 \geq 0.96$ , whereas higher salinities (2000–5000 ppm) show progressively stronger decay, corroborating the electrostatic stability classifications derived from zeta potential and size data.

**Table S1.** One-way ANOVA summary for interfacial tension (IFT) responses to SiO<sub>2</sub> concentration and brine salinity in sandstone and carbonate cores ( $n = 3$  per condition).

| Comparison (factor)                                                    | Lithology | IFT range (mN/m)*                       | df_effect | df_error | F     | p     | $\eta^2$ |
|------------------------------------------------------------------------|-----------|-----------------------------------------|-----------|----------|-------|-------|----------|
| SiO <sub>2</sub> concentration 0.00–0.05 wt% at fixed 5000 ppm NaCl    | Sandstone | $27.5 \pm 1.6 \rightarrow 18.9 \pm 1.0$ | 5         | 12       | 68.9  | 0.001 | 0.782    |
| SiO <sub>2</sub> concentration 0.00–0.05 wt% at fixed 5000 ppm NaCl    | Carbonate | $29.8 \pm 1.9 \rightarrow 21.2 \pm 1.2$ | 5         | 12       | 61.3  | 0.001 | 0.761    |
| Salinity 5000 $\rightarrow$ 500 ppm at fixed 0.05 wt% SiO <sub>2</sub> | Sandstone | $18.9 \pm 1.0 \rightarrow 4.6 \pm 0.4$  | 3         | 8        | 112.4 | 0.001 | 0.875    |
| Salinity 5000 $\rightarrow$ 500 ppm at                                 | Carbonate | $21.2 \pm 1.2 \rightarrow$              | 3         | 8        | 104.  | 0.00  | 0.86     |

|                                 |   |           |  |  |   |   |   |
|---------------------------------|---|-----------|--|--|---|---|---|
| fixed 0.05 wt% SiO <sub>2</sub> | e | 5.2 ± 0.4 |  |  | 7 | 1 | 8 |
|---------------------------------|---|-----------|--|--|---|---|---|

\*IFT ranges summarize the mean ± SD values between the highest and lowest levels of the factor within each ANOVA (from baseline to strongest hybrid condition described in the main text).

**Table S2.** Statistical summary of wettability alteration outcomes for sandstone and carbonate cores under SiO<sub>2</sub>–low-salinity flooding

| Outcome / factor                                   | Lithology              | Comparison / contrast                         | Test statistic | df (effect, error) / df_t | p-value | Effect size      | values                                                   |
|----------------------------------------------------|------------------------|-----------------------------------------------|----------------|---------------------------|---------|------------------|----------------------------------------------------------|
| Contact angle by treatment × time                  | Both                   | All treatments × 24–168 h                     | F = 54.2       | (6, 24)                   | 0.001   | $\eta^2 = 0.871$ | Strong overall reduction from oil-wet to mixed/water-wet |
| Contact angle over time (hybrid only)              | Sandstone              | 24 h vs 72 h vs 168 h                         | F = 44.8       | (2, 10)                   | 0.001   | $\eta^2 = 0.818$ | 70 ± 4° → 55 ± 3° → 42 ± 3°                              |
| Contact angle over time (hybrid only)              | Carbonate              | 24 h vs 72 h vs 168 h                         | F = 42.3       | (2, 10)                   | 0.001   | $\eta^2 = 0.809$ | 80 ± 4° → 65 ± 3° → 50 ± 3°                              |
| USBM wettability index by treatment                | Sandstone              | Baseline, LSW, SiO <sub>2</sub> -only, hybrid | F = 39.6       | (3, 8)                    | 0.001   | $\eta^2 = 0.789$ | −0.34 ± 0.07 → +0.21 ± 0.06                              |
| USBM wettability index by treatment                | Carbonate              | Baseline, LSW, SiO <sub>2</sub> -only, hybrid | F = 32.8       | (3, 8)                    | 0.001   | $\eta^2 = 0.766$ | −0.41 ± 0.09 → +0.15 ± 0.05                              |
| Maximum contact-angle reduction ( $\Delta\theta$ ) | Sandstone vs Carbonate | 62 ± 5° vs 60 ± 5°                            | t = 0.58       | 10                        | 0.575   | d = 0.33         | No significant lithology difference                      |
| Maximum USBM index shift ( $\Delta$ USBM)          | Sandstone vs Carbonate | +0.55 ± 0.06 vs +0.56 ± 0.05                  | t = 0.42       | 10                        | 0.684   | d = 0.24         | No significant lithology difference                      |
| Time to stabilization of contact angle             | Sandstone vs Carbonate | 72 ± 5 h vs 96 ± 6 h                          | t = 7.18       | 10                        | 0.001   | d = 4.15         | Faster stabilization in sandstone                        |

|                                                    |           |                           |   |   |   |   |                                                  |
|----------------------------------------------------|-----------|---------------------------|---|---|---|---|--------------------------------------------------|
| Reversion rate of contact angle (hybrid, 24–168 h) | Sandstone | Slope of $\theta$ vs time | — | — | — | — | –0.17°/day;<br>100% $\theta < 60^\circ$ at 168 h |
| Reversion rate of contact angle (hybrid, 24–168 h) | Carbonate | Slope of $\theta$ vs time | — | — | — | — | –0.18°/day;<br>95% $\theta < 60^\circ$ at 168 h  |
| Fraction of cores water-wet by USBM index          | Sandstone | Baseline vs hybrid        | — | — | — | — | 0% $\rightarrow$ 85% water-wet                   |
| Fraction of cores water-wet by USBM index          | Carbonate | Baseline vs hybrid        | — | — | — | — | 0% $\rightarrow$ 75% water-wet                   |

**Table S3.** Statistical summary of oil recovery and permeability outcomes under low-salinity water, SiO<sub>2</sub>-only, and hybrid flooding

| <b>Outcome factor</b> /                                | <b>Lithology</b> | <b>Comparison / contrast</b> | <b>Test statistic</b>         | <b>df (effect, error) / df<sub>t</sub></b> | <b>p-value</b> | <b>Effect size</b> | <b>Key quantitative values</b>                                            |
|--------------------------------------------------------|------------------|------------------------------|-------------------------------|--------------------------------------------|----------------|--------------------|---------------------------------------------------------------------------|
| Incremental recovery vs salinity (LSW flooding)        | Sandstone        | 500 vs 1000 vs 2000 ppm NaCl | F = 18.6                      | (2, 6)                                     | 0.003          | $\eta^2 = 0.861$   | 8.4 $\pm$ 0.9%, 11.7 $\pm$ 1.1%, 9.9 $\pm$ 1.0% OOIP                      |
| Incremental recovery vs salinity (LSW flooding)        | Carbonate        | 500 vs 1000 vs 2000 ppm NaCl | F = 14.2                      | (2, 6)                                     | 0.005          | $\eta^2 = 0.826$   | 5.6 $\pm$ 0.8%, 7.9 $\pm$ 0.9%, 6.8 $\pm$ 1.0% OOIP                       |
| Incremental recovery vs SiO <sub>2</sub> concentration | Sandstone        | 0.01 vs 0.03 vs 0.05 wt%     | $\beta = 0.89$ ; $R^2 = 0.92$ | df <sub>t</sub> = 5                        | 0.001          | —                  | 6.2 $\pm$ 0.8% $\rightarrow$ 12.1 $\pm$ 1.2% OOIP with increasing loading |
| Incremental recovery vs SiO <sub>2</sub> concentration | Carbonate        | 0.01 vs 0.03 vs 0.05 wt%     | $\beta = 0.84$ ; $R^2 = 0.88$ | df <sub>t</sub> = 5                        | 0.002          | —                  | 4.1 $\pm$ 0.7% $\rightarrow$ 9.0 $\pm$ 0.9% OOIP with increasing loading  |

|                                                                      |           |                                     |                   |        |       |                  |                                                                                                  |
|----------------------------------------------------------------------|-----------|-------------------------------------|-------------------|--------|-------|------------------|--------------------------------------------------------------------------------------------------|
| Treatment comparison (Baseline vs LSW vs SiO <sub>2</sub> vs Hybrid) | Sandstone | Recovery across four flooding modes | F = 41.5          | (3, 8) | 0.001 | $\eta^2 = 0.839$ | Baseline 28.7 ± 2.8% → LSW 11.7 ± 1.1% → SiO <sub>2</sub> 12.1 ± 1.2% → Hybrid 18.6 ± 1.3% OOIP* |
| Post hoc contrast Hybrid vs LSW                                      | Sandstone | Incremental recovery difference     | $\Delta = +6.9\%$ | —      | 0.004 | —                | Hybrid 18.6 ± 1.3% vs LSW 11.7 ± 1.1% OOIP                                                       |
| Treatment comparison (Baseline vs LSW vs SiO <sub>2</sub> vs Hybrid) | Carbonate | Recovery across four flooding modes | —                 | —      | —     | —                | Baseline 22.5 ± 3.1% → LSW 7.9 ± 0.9% → SiO <sub>2</sub> 9.0 ± 0.9% → Hybrid 14.1 ± 1.1% OOIP*   |
| Post hoc contrast Hybrid vs LSW                                      | Carbonate | Incremental recovery difference     | $\Delta = +6.2\%$ | —      | 0.005 | —                | Hybrid 14.1 ± 1.1% vs LSW 7.9 ± 0.9% OOIP                                                        |
| Permeability change after SiO <sub>2</sub> -only flooding            | Sandstone | Pre vs post flooding                | —                 | —      | —     | —                | −1.4 ± 0.3% relative change                                                                      |
| Permeability change after hybrid flooding                            | Sandstone | Pre vs post flooding                | —                 | —      | —     | —                | −1.6 ± 0.3% relative change                                                                      |
| Permeability change after SiO <sub>2</sub> -only flooding            | Carbonate | Pre vs post flooding                | —                 | —      | —     | —                | −1.1 ± 0.2% relative change                                                                      |
| Permeability change after hybrid flooding                            | Carbonate | Pre vs post flooding                | —                 | —      | —     | —                | −1.7 ± 0.3% relative change                                                                      |
| Nanoparticle breakthrough and retention                              | Sandstone | SiO <sub>2</sub> -only vs Hybrid    | —                 | —      | —     | —                | Effluent 17.2 ± 1.1 vs 15.3 ± 1.0 mg/L; retention 0.52 ± 0.06 mg/g rock (Hybrid)                 |
| Nanoparticle breakthrough                                            | Carbonate | SiO <sub>2</sub> -only vs Hybrid    | —                 | —      | —     | —                | Effluent 15.3 ± 1.0 vs 13.6 ± 0.9                                                                |

|               |  |  |  |  |  |  |                                                      |
|---------------|--|--|--|--|--|--|------------------------------------------------------|
| and retention |  |  |  |  |  |  | mg/L; retention<br>0.47 ± 0.05 mg/g<br>rock (Hybrid) |
|---------------|--|--|--|--|--|--|------------------------------------------------------|

\*Cumulative recovery including baseline and subsequent flooding stages reached 48.3 ± 2.6% OOIP in sandstone and 36.8 ± 2.4% OOIP in carbonat

**Table S4.** Integrated Performance Outcomes and Predictive Relationships

| Category                       | Metric                             | Sandstone                                          | Carbonate            | Notes                                 |
|--------------------------------|------------------------------------|----------------------------------------------------|----------------------|---------------------------------------|
| Regression models<br>(n=6)     | %ΔIFT → %OOIP                      | B=0.42 ± 0.08, R <sup>2</sup> =0.64                |                      | t(5)=5.25, p=0.002                    |
|                                | ΔContact angle → %OOIP             | B=0.31 ± 0.07, R <sup>2</sup> =0.59                |                      | t(5)=4.43, p=0.004                    |
|                                | Combined (%ΔIFT + Δθ) → %OOIP      | B=0.27 ± 0.06; B=0.22 ± 0.05, R <sup>2</sup> =0.78 |                      | p=0.010; p=0.014                      |
| Hybrid efficiency              | Mean IFT (mN/m)                    | 4.2 ± 0.5                                          | 4.8 ± 0.6            | t(4)=2.14, p=0.097                    |
|                                | Mean ΔContact angle (°)            | 46.3 ± 4.2                                         | 41.8 ± 3.9           | t(4)=2.59, p=0.062                    |
|                                | Mean Incremental Recovery (% OOIP) | 18.6 ± 1.3                                         | 14.1 ± 1.1           | t(4)=4.72, p=0.009                    |
| Proportion meeting targets     | IFT < 5 mN/m                       | 3/3 (100%)<br>Hybrid                               | 3/3 (100%)<br>Hybrid | RR=1.33, p=0.042;<br>RR=1.50, p=0.039 |
|                                | Δθ > 40°                           | 3/3 (100%)<br>Hybrid                               | 3/3 (100%)<br>Hybrid |                                       |
|                                | Recovery ≥ 10% OOIP                | 3/3 (100%)<br>Hybrid                               | 3/3 (100%)<br>Hybrid |                                       |
| Ranked performance<br>(Hybrid) | IFT (mN/m)                         | 4.2 (95% CI: 3.6–4.8)                              |                      | p=0.041, stable 168 h                 |
|                                | ΔContact angle (°)                 | 46.3 (41.2–51.4)                                   |                      | p=0.038, no reversion                 |
|                                | Incremental Recovery (% OOIP)      | 18.6 (16.3–20.9)                                   |                      | p=0.009, plateau 3.2 PV               |
|                                | Retention efficiency (mg/g rock)   | 0.52 (0.44–0.60)                                   |                      | p=0.062, Δk < 2%                      |
